# Supplementary material
Source: PubMed Central journal article supplement (PMC2758136)
Supplement: ddp346_1.pdf [file ddp346_1.pdf]

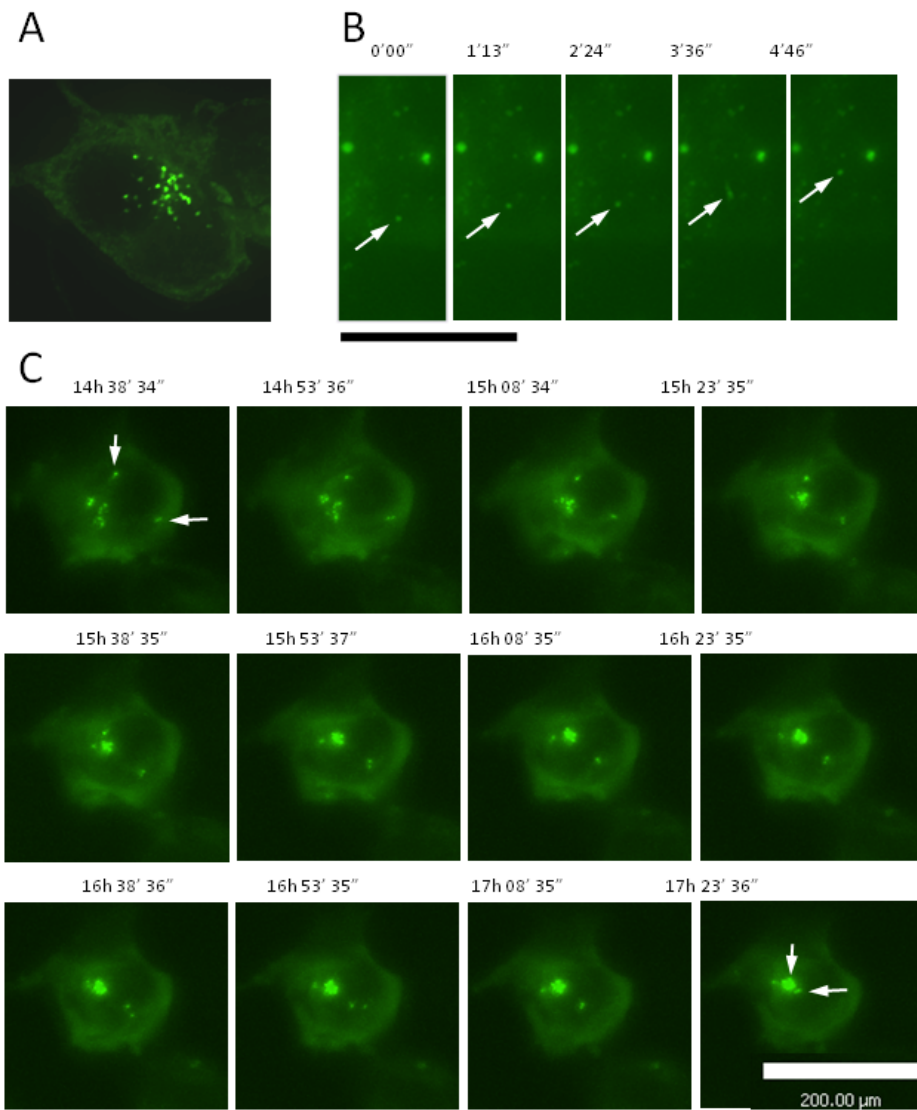

Figure S1

Alegre-Abarrategui et al.

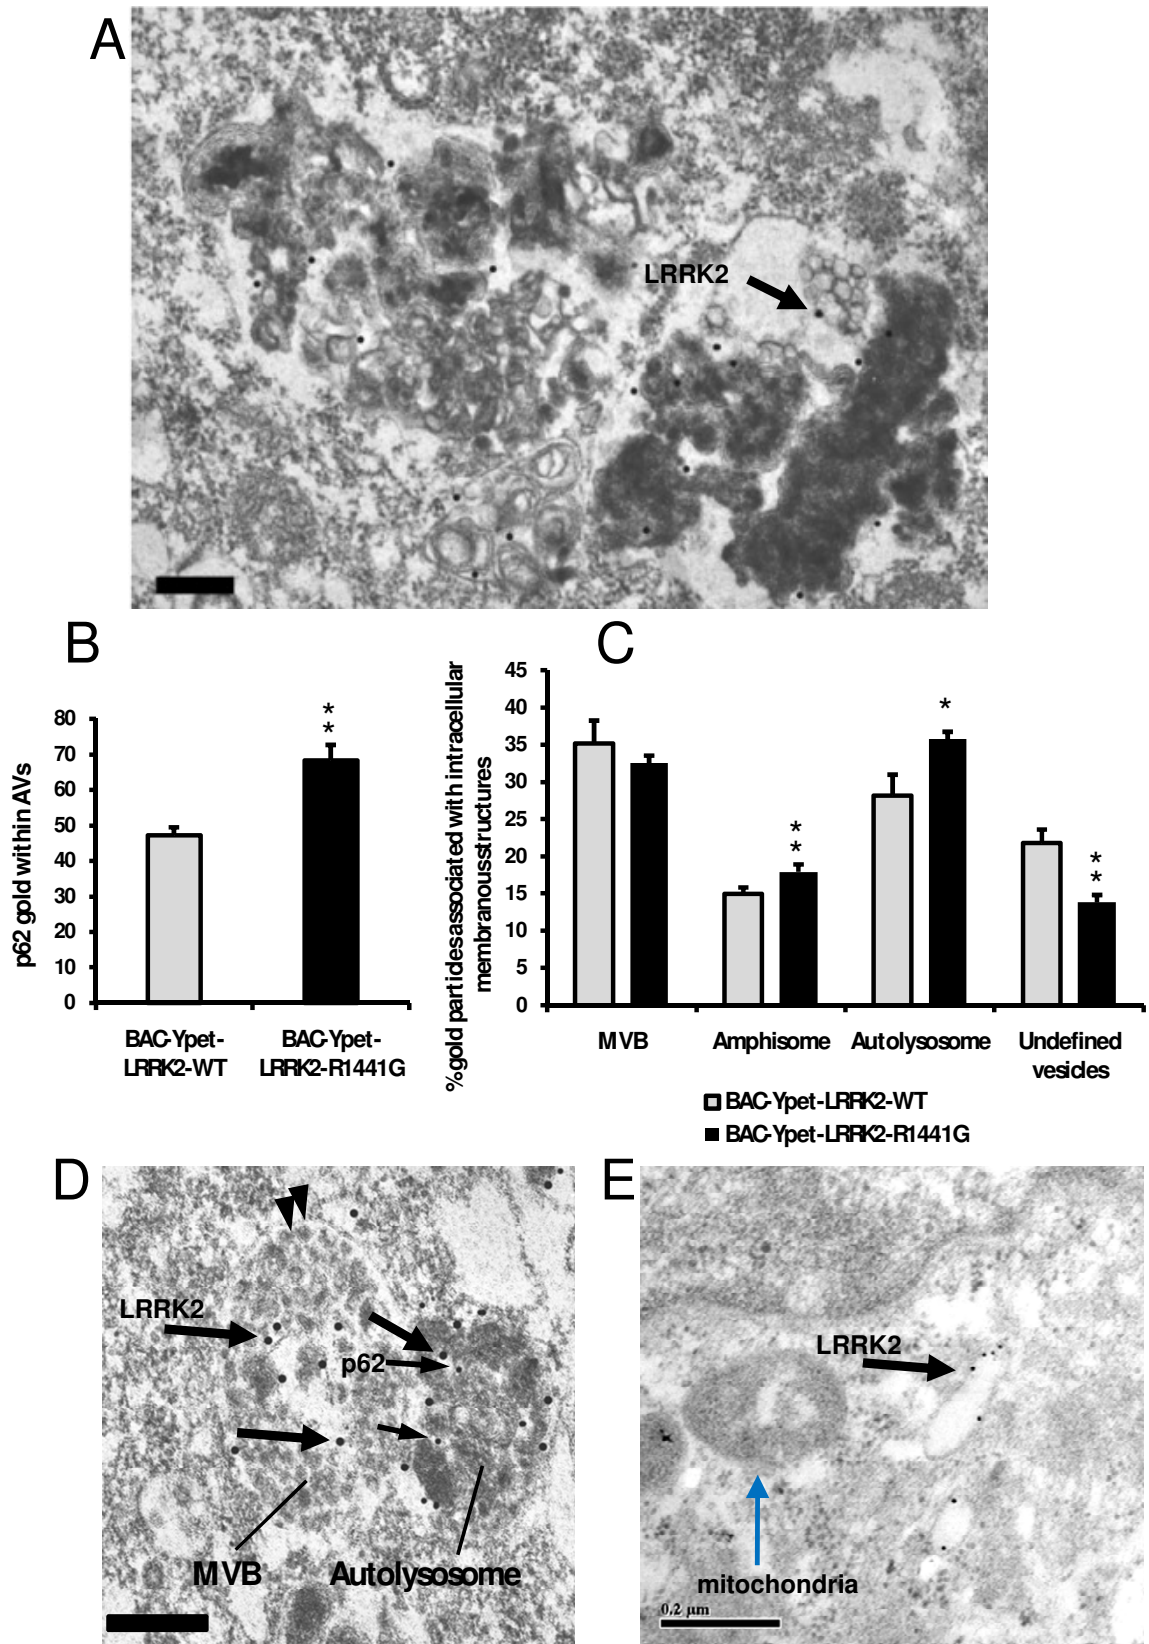

Figure S2

Alegre-Abarrategui et al.

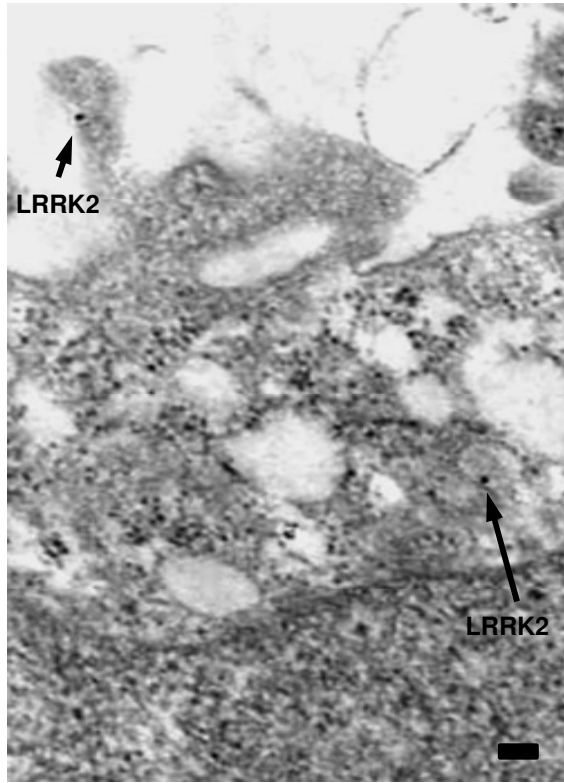

Figure S3

Alegre-Abarrategui et al.

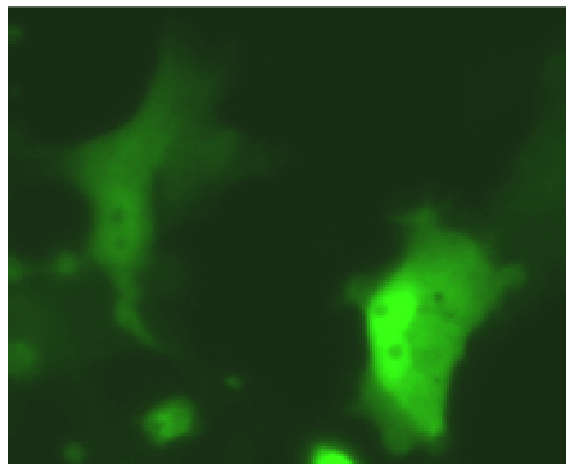

Figure S4

Alegre-Abarrategui et al.

## SI Figure Legends

Fig. S1. **LRRK2 puncta move towards a paranuclear location.** Cells were transfected with the BAC-YPet-LRRK2-R1441G (A and C) or BAC-YPet-LRRK2-WT (B) and imaged by immunofluorescence (A) or live-cell fluorescence microscopy (B and C). (A) LRRK2 puncta distributed occasionally over a radial pattern with the centre in a paranuclear location. (B) Larger LRRK2 puncta (up to  $\approx 1 \mu\text{m}$  in diameter), generally lying close to the nucleus, tended to move very little. Smaller puncta ( $\approx 0.5 \mu\text{m}$  or less), however, were highly dynamic and described trajectories in which movement proceeded by leaps rather than by smooth, gradual transitions (saltatory movement)(arrows). Speeds of  $\approx 0.5 \mu\text{m}/\text{sec}$  were observed, with a mean speed of  $\approx 0.18 \mu\text{m}/\text{sec}$ . (C) LRRK2 puncta frequently described a net movement towards a paranuclear location when photographed at regular intervals for several hours compatible with the known dynein-mediated transport of MVBs towards the centrosome (1). No difference in speed was observed between WT and mutant.

Fig. S2. **The R1441G LRRK2 pathogenic mutation led to the accumulation of complex AVs containing increased load of p62 and LRRK2.** (A) The R1441G mutation increased the size and complexity of AVs in transfected cells, inducing the formation of complex hybrid organelles of up to  $4 \mu\text{m}$  long containing a mixture of amorphous material, vesicles and incompletely digested darker material. (B) The R1441G mutation led to an accumulation of p62 within AVs as measured by the amount of gold in IEM staining of transfected cells. (C) Upon expression of the R1441G mutation, LRRK2 showed a shift from morphologically-undefined vesicles to AVs, as measured by the total amount of gold per cell in IEM staining of transfected cells using anti-GFP antibodies. (D) IEM photograph of HEK293 cells transfected with BAC-YPet-LRRK2-WT and double labelled with anti-GFP (thick arrows) and p62 antibodies (thin arrows). AVs were double labelled for LRRK2 (GFP) and p62 (organelle on the right displays autolysosome) while MVBs were LRRK2 positive only (organelle on the left). Arrowheads demonstrate that MVBs may simulate to have a double membrane formed by the outer limiting membrane and the membranes of the ILVs. (E) LRRK2 also localised to a lesser extent to morphologically undefined small vesicular structures (arrow). Note that mitochondria (blue arrow) were not labelled. Scale bars represent  $500 \text{ nm}$  in A and D and  $200 \text{ nm}$  in E. Counting of all structures was done blind to the genotype. Bars represent mean plus standard error of the mean. Statistical significances were obtained using a Student's *t* test. \* $p < 0.05$ . \*\* $p < 0.01$ .

Fig. S3. **LRRK2 ultrastructural localisation detected with an anti-LRRK2 antibody.** Electron micrograph showing LRRK2 gold labelling on microvilli / filopodia (arrowhead) and intraluminal vesicles of a MVB (arrow) in detached HEK293 cells transfected with BAC-YPet-LRRK2-WT and immunolabelled with the anti-LRRK2 antibody EB06550.

Fig. S4. **Untagged YPet expression.** Fluorescence microscopy showing diffuse cytoplasmic and nuclear distribution of untagged YPet expressed from HEK293 cells transfected with pCEP4YPet-MAMM.

### SI references

1. Driskell, O.J., Mironov, A., Allan, V.J. and Woodman, P.G. (2007) Dynein is required for receptor sorting and the morphogenesis of early endosomes, **9**, 113-120.

**Supplementary Table 1.** Oligonucleotide sequences used in the study

|                             |                                                                                          |
|-----------------------------|------------------------------------------------------------------------------------------|
| rpsl-neo check_S            | GAATTCTCTTTGTTGCTGTTGC                                                                   |
| AC107023-BACe3.6_A          | GGCCTGGCGGCCCGCCTGGCCGTCGACATTAGGTG<br>ACACTATAGAAGGATCCGCGTTGCACTTCTTATTGTGG<br>AATGTC  |
| AC084290 3'-pRpsL-<br>neo_S | ACATAATAGAGTTGTTTTCAACTCTATGTTGAATGTGGA<br>TACCCTGAATTTGGGCCTGGTGATGATGGCGGGATC          |
| pRpsl-neo_BACe3.6_A         | GGCCTGGCGGCCCGCCTGGCCGTCGACATTAGGTG<br>ACACTATAGAAGGATCCGCGTCAGAAGAACTCGTCA<br>AGAAGG    |
| OH-N-YPetwTHR_S_S           | GAGCAGCGGACGTTTCATGCTGGGAGGGCGGGCGG<br>GTTGGAAGCAGGTGCCACCATGGTGAGCAAAGGC<br>GAAGAGCTGTC |
| P-N-YPetwTHR_A_S            | CCTTCTTGACGAGTTCCTGACCTGACCGCCGCCGG<br>CATCACCAGGGCATGAACGAGCTCTATAAGGGAG<br>CTGGAG      |
| OH-N-YPetwTHR_A_A           | AACTTCTCAGAGTTCCCTCGTCCTCTTCGCACCCCTGA<br>CAGCTGCCACTAGCTCCAGCTCCAGCTCCCTTATAG<br>AGCTC  |
| P-N-YPetwTHR_S_A            | GATCCCGCCATCATCACCAGGCCGTCAGCTCCAC<br>CAGGATGGGCACCACGCCGGTGAACAGCTCTTCG<br>CCTTGCTCAC   |
| OH-GFPwTHRbis_S_S           | GGTGAGCTGAGCTCGCCCCGGGGAGCTGTGGCC<br>GGCGCCCCTGCCGGTCCCTGAGCAGCGGACGTT<br>CATGCTGGGAGG   |

|                           |                                                                                          |
|---------------------------|------------------------------------------------------------------------------------------|
| P-N-MYPetwTHR<br>bis_S_A  | CAGCTCTTCGCCCTTTGCTCACCATGGTGGCACCTGCTT<br>CCAACCCGCCGCCCTCCCAGCATGAACGTCCGC             |
| P-N-MYPetwTHR<br>bis_A_S  | GGGCATGAACGAGCTCTATAAGGGAGCTGGAGCTG<br>GAGCTAGTGGCAGCTGTCAGGGGTGCGAAGAGGA<br>CGAGGAAACTC |
| OH-N-<br>EmGFPwTHRbis_A_A | GCGTTTCTATCTGTTTTCTTCCTGGACATTGTTTCAGCCTG<br>ACTATCAACTTCTTCAGAGTTTCTCGTCTCTTCGCAC       |
| G2019S EcoRI_S            | GCTGCAGGAATTCAAGGGACAAAGTGAGCACAG                                                        |
| G2019S XhoI_A             | GCCCCCCTCGAGTTTTTGCCCTGAAAAATTACATC                                                      |
| R1441G EcoRI_S            | GCTGCAGGAATTCAAGGCATGAAGATGGGAAAG                                                        |
| R1441G XhoI_A             | GCCCCCCTCGAGTGATGGTTTTCCGAAGTTTTG                                                        |
| G2019S SDM_S              | GCAAAGATTGCTGACTACAGCATTGCTCAGTACTG                                                      |
| G2019 SDM_A               | GCAGTACTGAGCAATGCTGTAGTCAGCAATCTTTGC                                                     |
| R1441G SDM_S              | GTCTTCCCTCCAGGCTTGCGCTTCTTCTCCCTG                                                        |
| R1441G SDM_A              | CAGGGGAAGAAGAAGCGCAAGCCTGGAGGGAAA<br>GAC                                                 |
| RpSL G2019S_S             | GCTGCTTTTCACTGTATCCCAATGCTGCCATCATTGC<br>AAAGATTGCTGACTACGGCCTGGTGATGATGGCGGG<br>ATC     |
| RpSL G2019S_A             | CCTGGTGTGCCCTCTGATGTTTTATCCCCATTCTACAG<br>CAGTACTGAGCAATGCTCAGAAGAAGTCTCAAGAA<br>GG      |
| RpSL R1441G_S             | GCAGGCCAGTTTGAAAGCAAACACAAGAGGGTTTT<br>GTGTCTTCCCTCCAGGCTGGCCTGGTGATGATGGCG<br>GGATC     |
| RpSL R1441G_A             | TCATCAGAAACATCCAAATGTGTGCCAACGAGAATC<br>ACAGGGGAAGAAGAAGCGCTCAGAAGAAGTCTCGTC<br>AAGAAGG  |
| G2019S_S                  | AAGGGACAAAGTGAGCACAG                                                                     |
| G2019S_A                  | TTTTGCCCTGAAAAATTACATC                                                                   |
| R1441G_S                  | AAGGCATGAAGATGGGAAAG                                                                     |
| R1441G_A                  | TGATGGTTTTCCGAAGTTTTG                                                                    |

|                        |                            |
|------------------------|----------------------------|
| SP AC084290 at -10Kb   | GCGTATTGCCTACAAAAACC       |
| ASP AC084290 at -10Kb  | AGCAGCTTGCACAACCTTTC       |
| SP for AC084290 MIDDLE | TTCCCAATCTATTCAAGGATCAG    |
| AC084290 3' 1KB_S      | TGCTTAAGACAGGACTATTGCTTG   |
| AC084290 3' 1KB_A      | GCATCACAAATTTAGGGAAAAG     |
| AC084290 3' end_S      | GAATGTGGATACCCTGAATTTG     |
| pBACe3.6 5'end_A       | TTGATGTTTCATGTTTCATGTCTCC  |
| pBACe3.6 3'end_S       | AGGACTATATTGCTCTAATAAATTGC |
| AC084290 5'end_A       | GGATGGGTAGTTGGCAGAAG       |
